# Supplementary material
Source: PubMed Central journal article supplement (PMC5599189)

Supplemental Figures for:  
Real World Data on Prognostic Factors for Overall Survival in EGFR mutation-positive Advanced NSCLC Patients Treated with first-line Gefitinib  
Wei-Yu Liao et al.

**Figure S1.** Kaplan–Meier survival curves of overall survival in a) patients with post-operative recurrence and newly diagnosed advanced NSCLC ( $P=0.018$ , Log-rank test), b) in patients with ECOG  $\geq 2$  and ECOG  $< 2$  ( $P<0.001$ , Log-rank test); progression free survival in c) patients with post-operative recurrence and newly diagnosed advanced NSCLC ( $P=0.12$ , Log-rank test), d) in patients with ECOG  $\geq 2$  and ECOG  $< 2$  ( $P=0.001$ , Log-rank test)

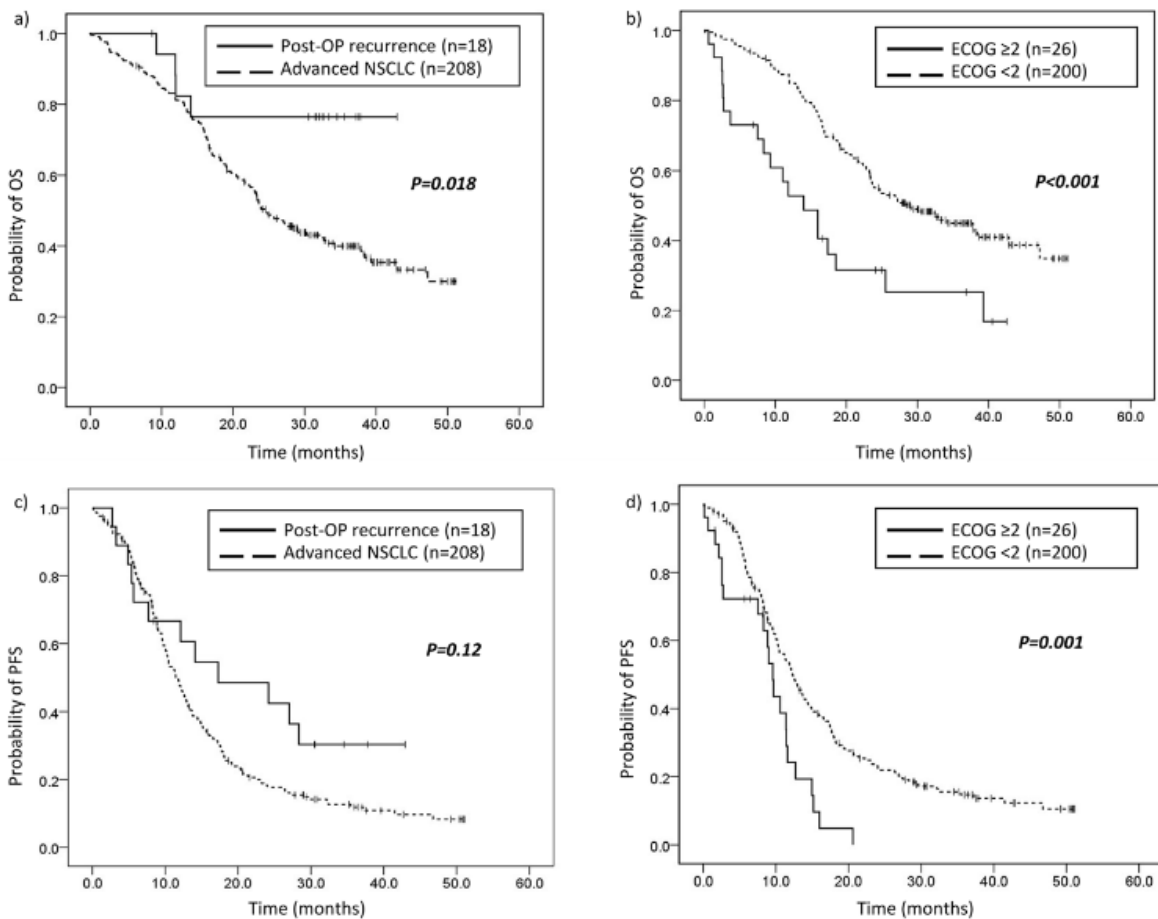

Supplemental Figures for:  
Real World Data on Prognostic Factors for Overall Survival in EGFR mutation-positive Advanced NSCLC Patients Treated with first-line Gefitinib  
Wei-Yu Liao et al.

**Figure S2.** Kaplan–Meier survival curves of progression free survival in a) patients with Exon 19 deletion and L858R mutation ( $P=0.649$ , Log-rank test), b) in patients with smoking index  $\geq 20$  pack-year and smoking index  $< 20$  pack-year ( $P=0.362$ , Log-rank test), c) in patients with chronic hepatitis C, without chronic hepatitis C and unknown HCV status ( $P=0.39$ , Log-rank test), d) in patients with liver metastasis and without liver metastasis ( $P<0.001$ , Log-rank test)

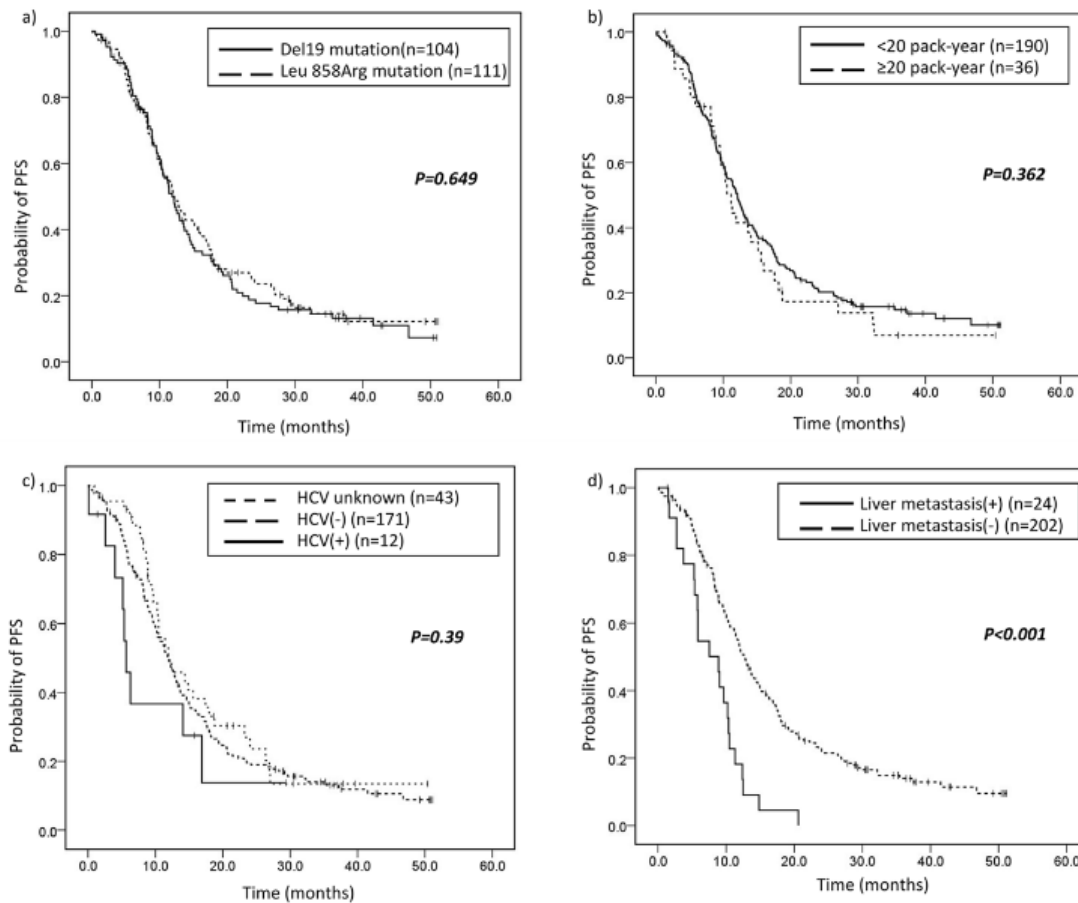

Supplemental Figures for:  
Real World Data on Prognostic Factors for Overall Survival in EGFR mutation-positive Advanced NSCLC Patients Treated with first-line Gefitinib  
Wei-Yu Liao et al.

**Figure S3.** Kaplan–Meier survival curves of overall survival in patients without hepatotoxicity, with grade I hepatotoxicity and grade II hepatotoxicity

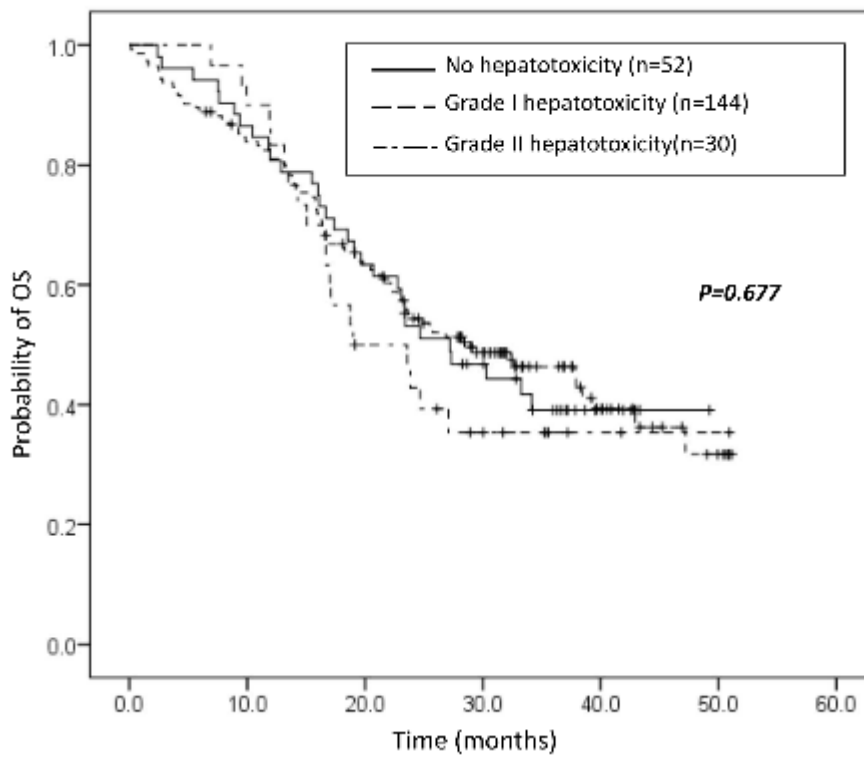

Supplement: supp_the2016-0331_onco12155-sup-0001-suppinfo01.pdf [file supp_the2016-0331_onco12155-sup-0001-suppinfo01.pdf]
