# Supplementary material
Source: PubMed Central journal article supplement (PMC5599189)
Supplement: supp_the2016-0331_onco12155-sup-0002-suppinfo02.pdf [file supp_the2016-0331_onco12155-sup-0002-suppinfo02.pdf]

Supplemental Tables for:  
Real World Data on Prognostic Factors for Overall Survival in EGFR mutation-positive Advanced NSCLC Patients Treated with first-line Gefitinib  
Wei-Yu Liao et al.

Table S1: Treatment and survival of 12 patients with chronic HCV infection

| Patient    | 2 <sup>nd</sup> therapy  | 3 <sup>rd</sup> therapy | 4 <sup>th</sup> therapy | 5 <sup>th</sup> therapy | Cause of death | PFS(m) | OS(m) |
|------------|--------------------------|-------------------------|-------------------------|-------------------------|----------------|--------|-------|
| Patient 1  | Pemetrexed + Carboplatin | Erlotinib               | Vinorelbine             | Afatinib                | Cancer related | 5.2    | 13.6  |
| Patient 2  | Pemetrexed + Carboplatin | Erlotinib               | Gefitinib+ MSC2156119J  | NA                      | Alive          | 5.6    | 37.2  |
| Patient 3  | Gefitinib                | Pemetrexed              | NA                      | NA                      | Cancer related | 5.4    | 12    |
| Patient 4  | NA                       | NA                      | NA                      | NA                      | Cancer related | 1.4    | 1.6   |
| Patient 5  | Pemetrexed + Cisplatin   | Gemcitabine             | NA                      | NA                      | Cancer related | 0.7    | 5.4   |
| Patient 6  | NA                       | NA                      | NA                      | NA                      | Alive          | 29.3   | 30.0  |
| Patient 7  | NA                       | NA                      | NA                      | NA                      | Cancer related | 15.8   | 15.8  |
| Patient 8  | Vinorelbine              | Erlotinib               | NA                      | NA                      | Cancer related | 6.3    | 16.3  |
| Patient 9  | NA                       | NA                      | NA                      | NA                      | Cancer related | 2.6    | 2.6   |
| Patient 10 | NA                       | NA                      | NA                      | NA                      | Cancer related | 14.1   | 14.1  |
| Patient 11 | Pemetrexed + Cisplatin   | Docetaxel               | Erlotinib               | Vinorelbine             | Cancer related | 4.0    | 16.4  |
| Patient 12 | NA                       | NA                      | NA                      | NA                      | Cancer related | 16.9   | 16.9  |

Abbreviation: NA= not applicable

Supplemental Tables for:  
Real World Data on Prognostic Factors for Overall Survival in EGFR mutation-positive Advanced NSCLC Patients Treated with first-line Gefitinib  
Wei-Yu Liao et al.

Table S2: Post progression treatment

| PD(n=187)                            | No.(% of PD)       |
|--------------------------------------|--------------------|
| <b>Subsequent systemic treatment</b> | <b>153 (81.4%)</b> |
| Chemotherapy                         | 129 (68.6%)        |
| Paclitaxel                           | 17 (9.0%)          |
| Docetaxel                            | 36 (19.1%)         |
| Platinum-based doublet               | 112 (59.6%)        |
| Gemcitabine                          | 36 (19.1%)         |
| Vinorelbine                          | 26 (13.8%)         |
| <b>EGFR-targeted</b>                 | <b>130 (69.1%)</b> |
| Erlotinib                            | 79 (42.0%)         |
| Afatinib                             | 41 (21.8%)         |
| Gefitinib                            | 25 (13.3%)         |
| AZD9291                              | 11 (6.9%)          |
| EGF816                               | 5 (2.7%)           |
| CO1686                               | 1 (0.5%)           |
| Others                               | -                  |
| With Bevacizumab                     | 10 (5.3%)          |
| Other clinical trials                | 5 (2.7%)           |

Supplemental Tables for:  
Real World Data on Prognostic Factors for Overall Survival in EGFR mutation-positive Advanced NSCLC Patients Treated with first-line Gefitinib  
Wei-Yu Liao et al.

Table S3: Grade of hepatotoxicity and HCV status

| <b>HCV status</b>  | No hepatotoxicity | Grade I hepatotoxicity | Grade II hepatotoxicity |
|--------------------|-------------------|------------------------|-------------------------|
| CV (-)             | 37(21.6%)         | 106(62%)               | 28(16.4%)               |
| CV (+)             | 1(8.3%)           | 9(75%)                 | 2(16.7%)                |
| Unknown HCV status | 14(32.6%)         | 29(67.4%)              | 0(0%)                   |

Supplemental Tables for:

Real World Data on Prognostic Factors for Overall Survival in EGFR mutation-positive Advanced NSCLC Patients Treated with first-line Gefitinib

Wei-Yu Liao et al.
